# Supplementary material for: Linking prokaryotic genome size variation to metabolic potential and environment
Source: PubMed Central journal article supplement (PMC10042847; doi:10.1038/s43705-023-00231-x), 2023-03-27

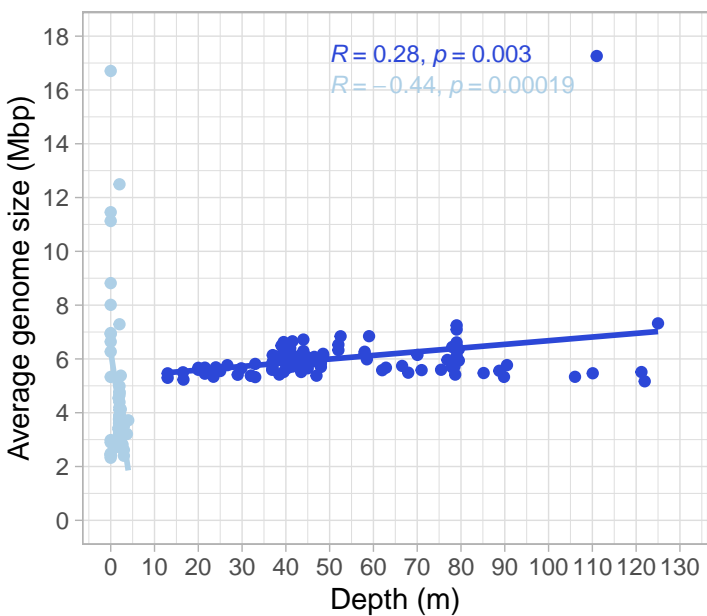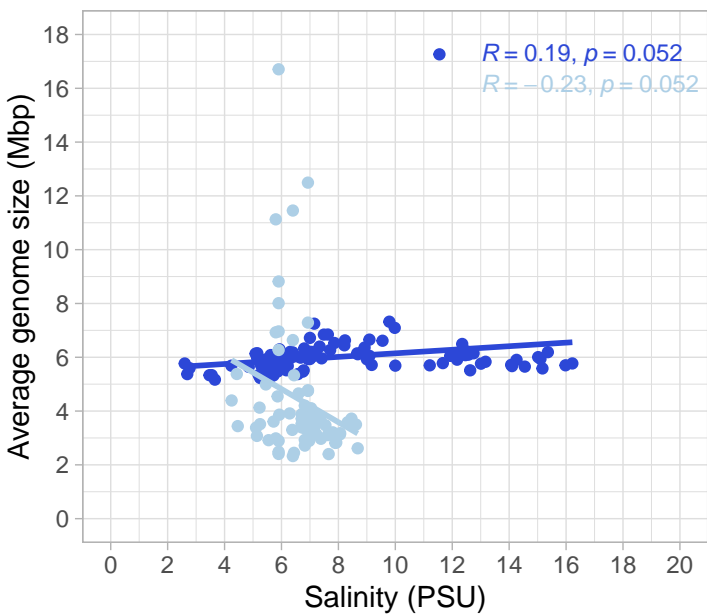

Supplement: 43705_2023_231_MOESM4_ESM.pdf [file 43705_2023_231_MOESM4_ESM.pdf]
